# Supplementary material for: Longitudinal uric acid has nonlinear association with kidney failure and mortality in chronic kidney disease
Source: PubMed Central journal article supplement (PMC9998636; doi:10.1038/s41598-023-30902-7), 2023-03-09

**Figure S3.** (A) Distribution of the time interval between two consecutive measures of uric acid, (B) Distribution of the timing of UA measures since the inclusion in CKD-REIN cohort.

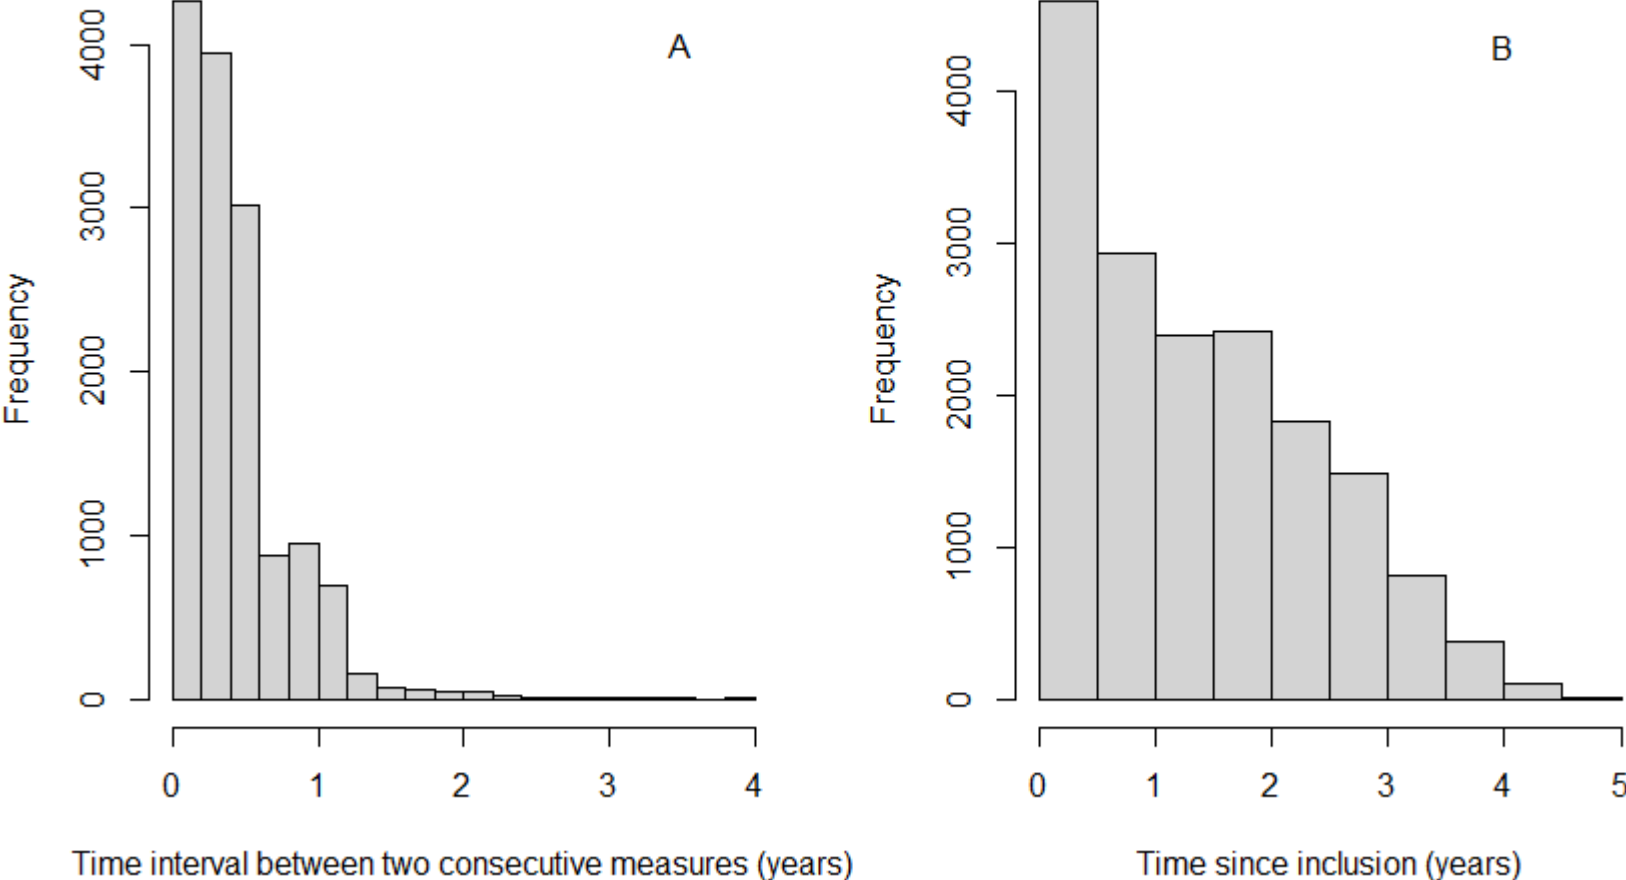

Supplement: 41598_2023_30902_MOESM3_ESM.pdf [file 41598_2023_30902_MOESM3_ESM.pdf]
