# Supplementary material for: Longitudinal uric acid has nonlinear association with kidney failure and mortality in chronic kidney disease
Source: PubMed Central journal article supplement (PMC9998636; doi:10.1038/s41598-023-30902-7), 2023-03-09
Supplement: 41598_2023_30902_MOESM4_ESM.pdf [file 41598_2023_30902_MOESM4_ESM.pdf]

**Figure S4.** Distribution of all observed repeated measures of serum uric acid level in CKD-REIN cohort according to the gender (10950 measures in 1821 men (panel A) and 5997 measures in 960 women (panel B)), France, 2013-2018

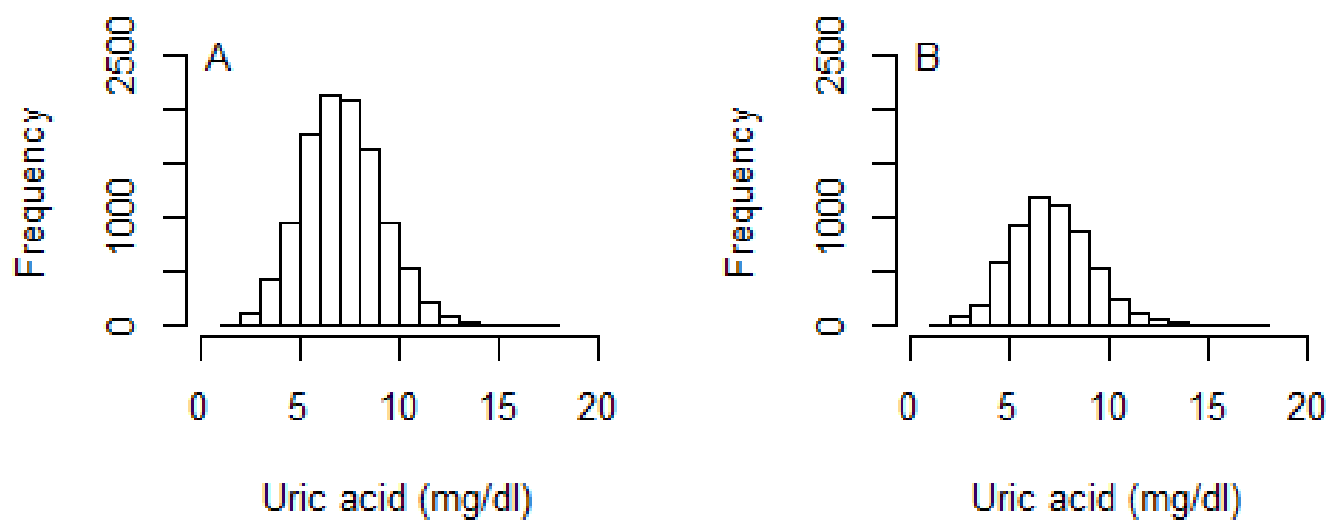

Uric acid in mg/dl to  $\mu\text{mol/l}$ , x 59.48
