# Supplementary material for: Longitudinal uric acid has nonlinear association with kidney failure and mortality in chronic kidney disease
Source: PubMed Central journal article supplement (PMC9998636; doi:10.1038/s41598-023-30902-7), 2023-03-09

**Figure S5.** Example of observed and estimated true values of uric acid in four selected subjects of the CKD-REIN cohort

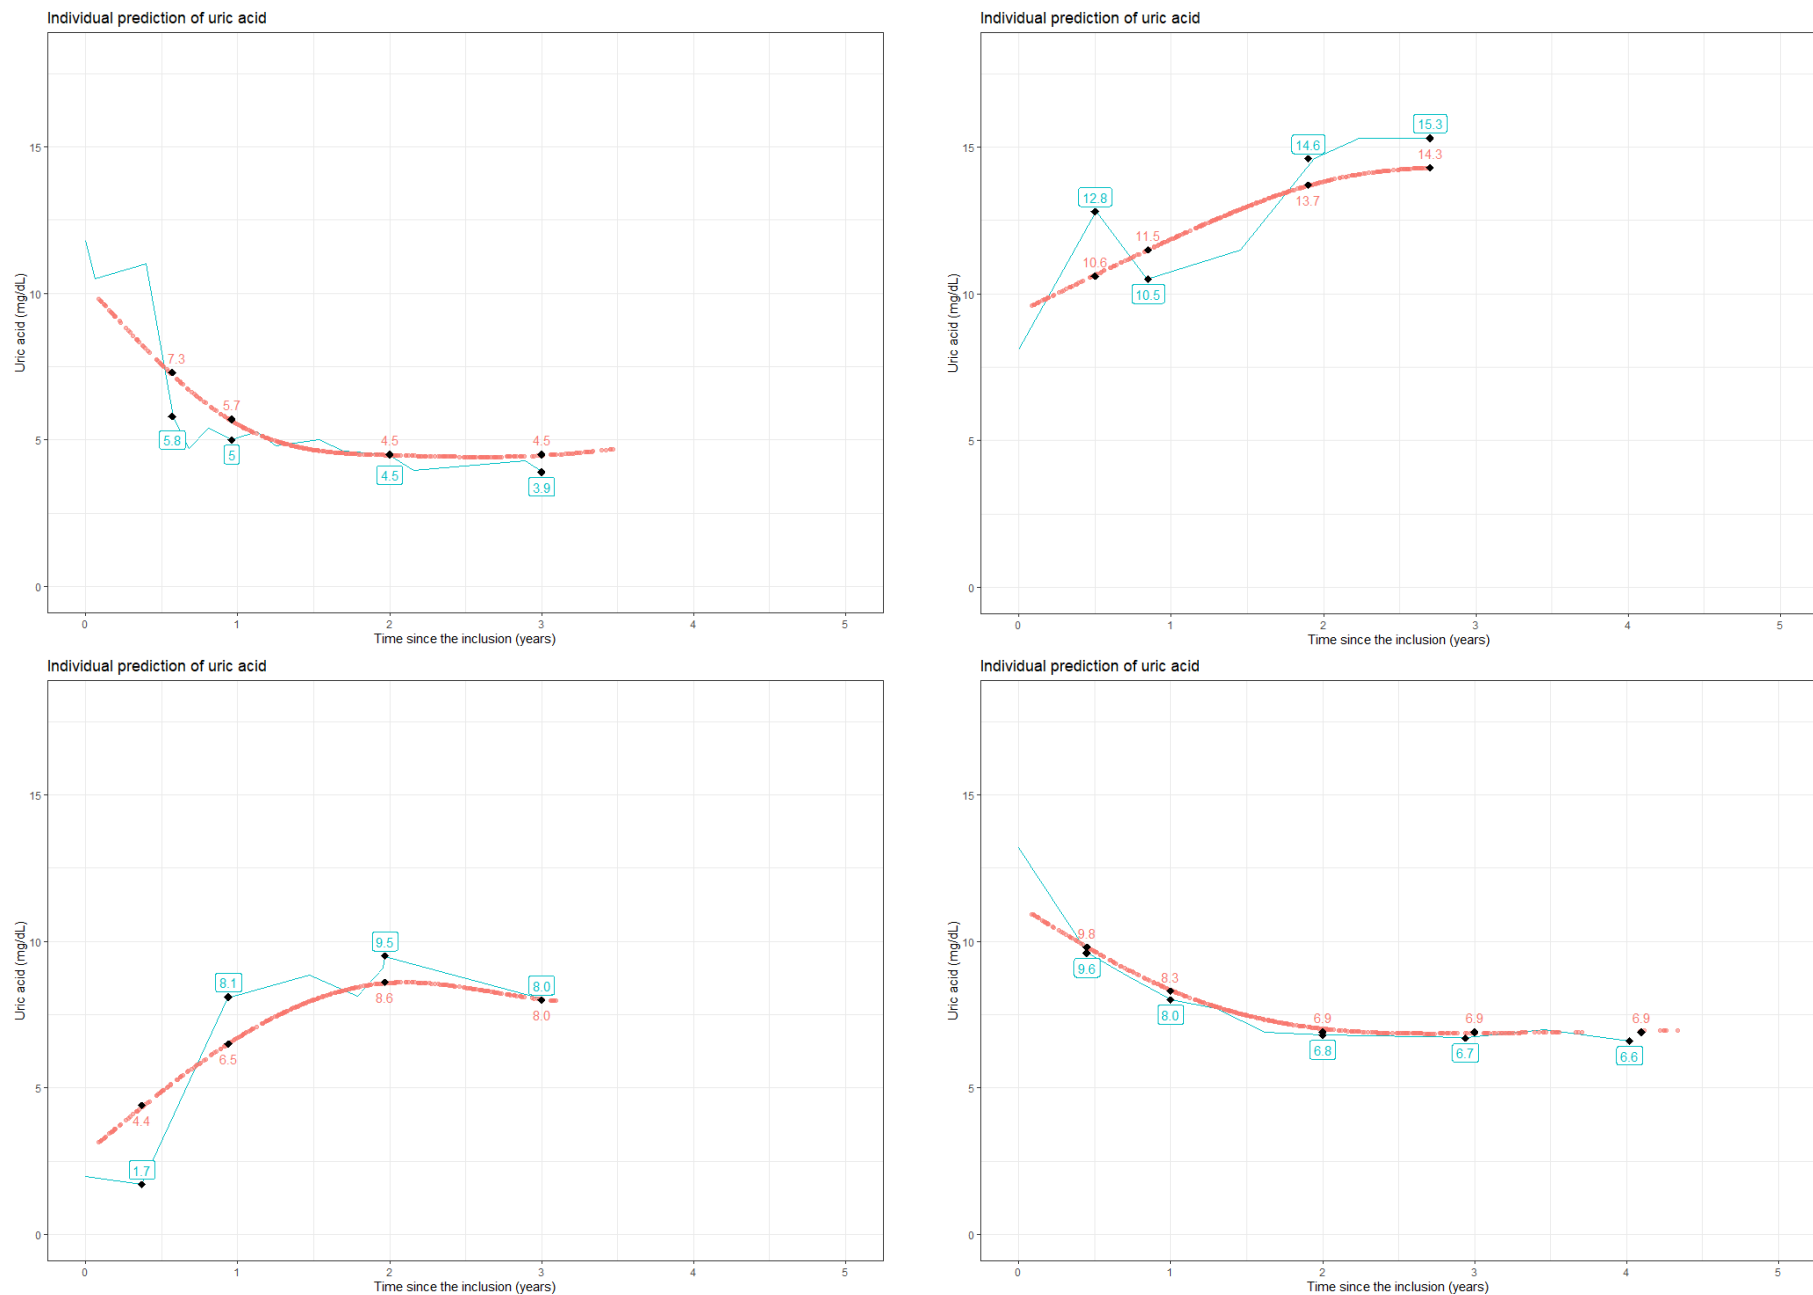

Supplement: 41598_2023_30902_MOESM5_ESM.pdf [file 41598_2023_30902_MOESM5_ESM.pdf]
