# Supplementary material for: Longitudinal uric acid has nonlinear association with kidney failure and mortality in chronic kidney disease
Source: PubMed Central journal article supplement (PMC9998636; doi:10.1038/s41598-023-30902-7), 2023-03-09

**Figure S7.** (A) Estimated effect of *current* uric acid value on the hazard of kidney failure in women (B) Estimated effect of *current* uric acid value on the hazard of kidney failure in men

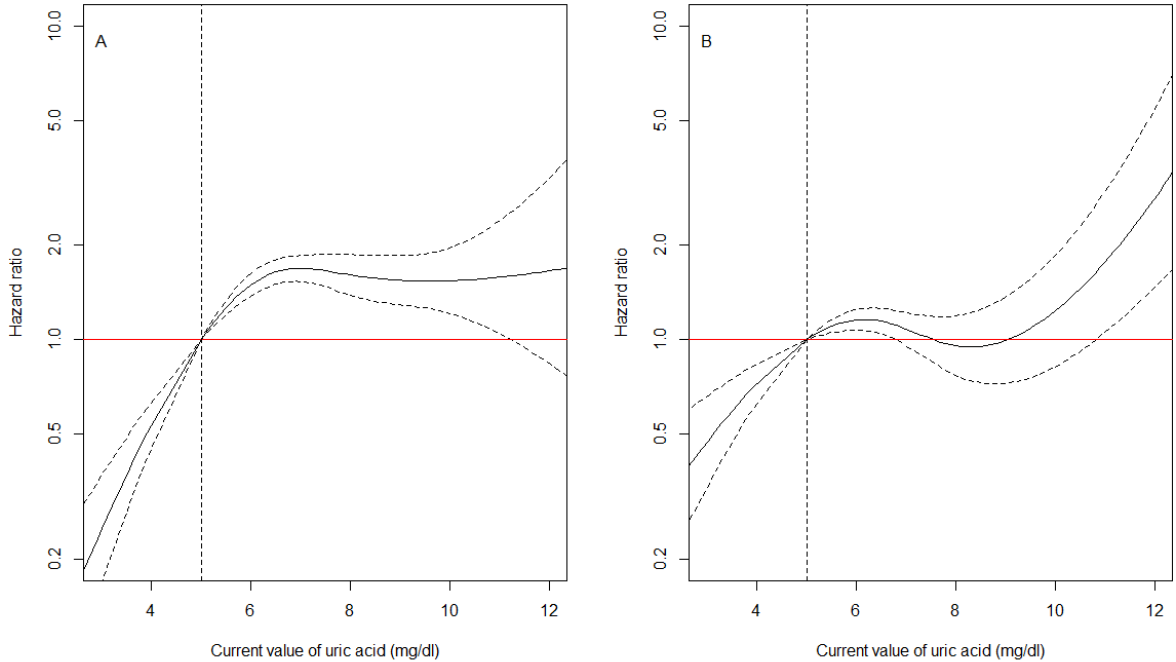

Supplement: 41598_2023_30902_MOESM7_ESM.pdf [file 41598_2023_30902_MOESM7_ESM.pdf]
